# Supplementary material for: Chimeric adenoviral (Ad5.F35) and listeria vector prime-boost immunization is safe and effective for cancer immunotherapy
Source: PubMed Central journal article supplement (PMC9226178; doi:10.1038/s41541-022-00483-z), 2022-06-23
Supplement: 41541_2022_483_MOESM1_ESM.pdf [file 41541_2022_483_MOESM1_ESM.pdf]

**<SUPPLEMENTARY INFORMATION FILE>**

**Prime-Boost Immunization with Chimeric Adenoviral (Ad5.F35) and *Listeria* Vectors is a Safe and Effective Strategy for Cancer Immunotherapy**

John C. Flickinger Jr, Ross E. Staudt, Jagmohan Singh, Robert Carlson, Joshua R. Barton, Trevor R. Baybutt, Jeffrey A. Rappaport, Alicja Zalewski, Amanda Pattison, Scott A. Waldman, Adam E. Snook

**TABLE OF CONTENTS**

Supplementary Figure 1. Ad-GUCY2C + Lm-GUCY2C is ineffective in a therapeutic model of metastatic colorectal cancer. .... 2

Supplementary Figure 2. Lm-GUCY2C boosting enhances GUCY2C-specific memory CD8<sup>+</sup> T-cell responses. .... 3

Supplementary Figure 3. Lm-GUCY2C boosts GUCY2C-specific CD8<sup>+</sup> T-cells generated long after initial priming vaccination. .... 4

Supplementary Figure 4. Prior Lm exposure does not reduce GUCY2C-specific CD8<sup>+</sup> T-cell expansion by Lm-GUCY2C boosting. .... 5

Supplementary Figure 5. Blood cytokine responses to Ad-GUCY2C + Lm-GUCY2C immunization. .... 6

Supplementary Figure 6. Clinical chemistry profiles following Ad-GUCY2C + Lm-GUCY2C immunization. .... 7

Supplementary Figure 7. Uncropped western blot images. .... 8

Supplementary Figure 8. Representative intracellular cytokine staining for polyfunctionality analysis. .... 9

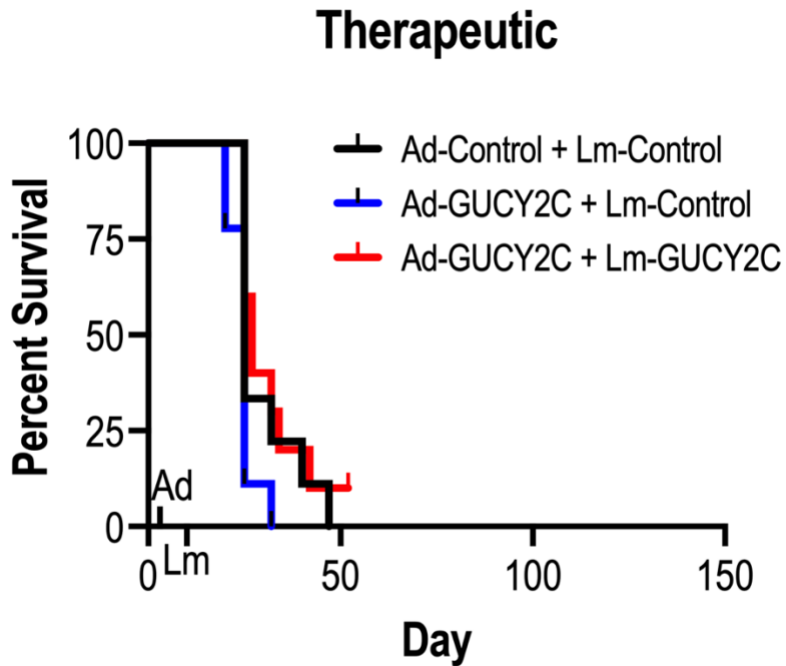

**Supplementary Figure 1. Ad-GUCY2C + Lm-GUCY2C is ineffective in a therapeutic model of metastatic colorectal cancer.** Metastatic colorectal cancer was established by i.v. administration of  $1 \times 10^5$  CT26 colorectal cancer cells to BALB/cJ mice ( $n = 9-10/\text{group}$ ). Mice were immunized as in **Fig. 3**, except an abbreviated scheduled was used: primed on day 3 with Ad5.F35 (Ad) vaccines and boosted 7 days later with Lm vaccines. Survival was monitored throughout the experiment and analyzed by the Mantel-Cox log rank test with all immunized groups compared to control immunization using the Bonferroni method to correct for multiple comparisons. No significant differences were observed.

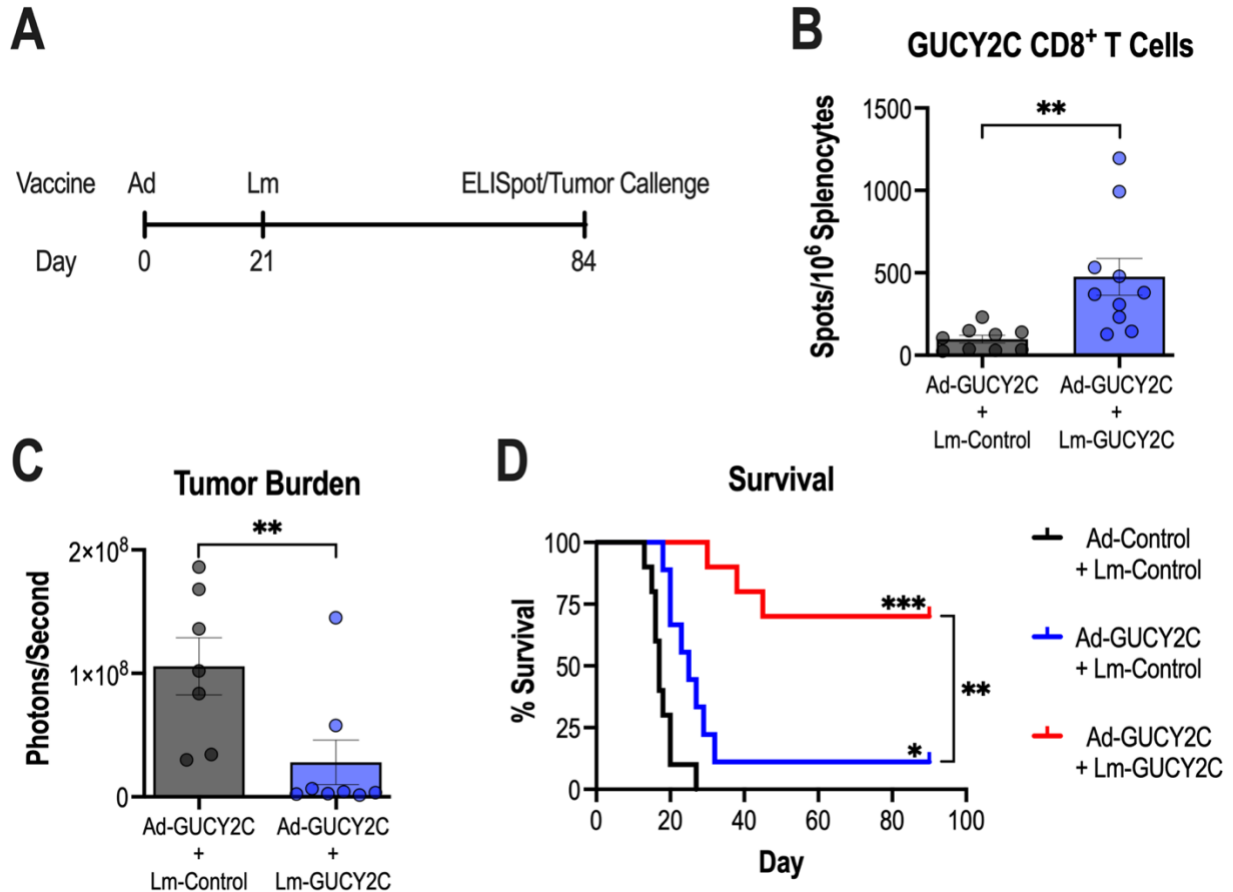

**Supplementary Figure 2. Lm-GUCY2C boosting enhances GUCY2C-specific memory CD8<sup>+</sup> T-cell responses.** **A-D** BALB/cJ mice were immunized with  $10^{10}$  vp of control or GUCY2C adenovirus (Ad5) on day 0 followed by boosting with  $5 \times 10^6$  CFU of control or GUCY2C Lm on day 21. Sixty-three days later, mice were euthanized to quantify GUCY2C-specific CD8<sup>+</sup> T-cell responses (**A**) or challenged with  $5 \times 10^5$  CT26 colorectal cancer cells expressing GUCY2C and firefly luciferase (**C-D**). Tumor burden was quantified on day 20 (**C**) and survival was monitored throughout the experiment (**D**). GUCY2C-specific CD8<sup>+</sup> T-cell counts (**B**) and tumor-burden (**C**) were analyzed by T-test and survival (**D**) was analyzed by the Mantel-Cox log rank test (multiple comparisons were corrected with the Bonferroni method). In **D**, significance compared to control is indicated on the line and compared between GUCY2C vaccine groups as indicated. Error bars indicate mean  $\pm$  SEM.

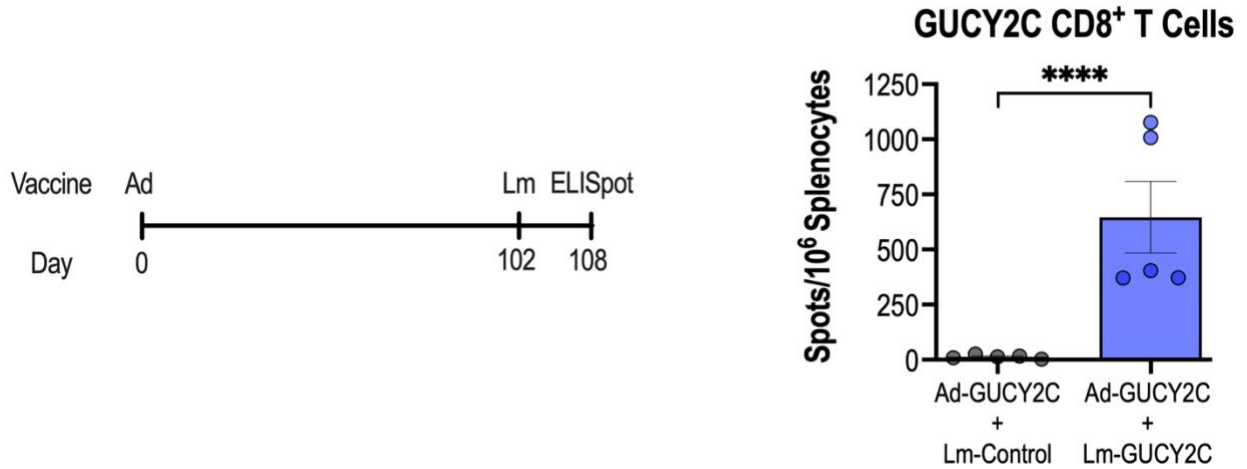

**Supplementary Figure 3. Lm-GUCY2C boosts GUCY2C-specific CD8<sup>+</sup> T-cells generated long after initial priming vaccination.** BALB/cJ mice were immunized intramuscularly with  $10^{10}$  vp of Ad-GUCY2C, boosted 102 days later with  $5 \times 10^6$  CFU of control or GUCY2C Lm intravenously. Six days later, GUCY2C-specific CD8<sup>+</sup> T-cells counts were quantified by IFN $\gamma$ -ELISpot. GUCY2C-specific CD8<sup>+</sup> T-cell counts were analyzed by T-test. Error bars indicate mean  $\pm$  SEM.

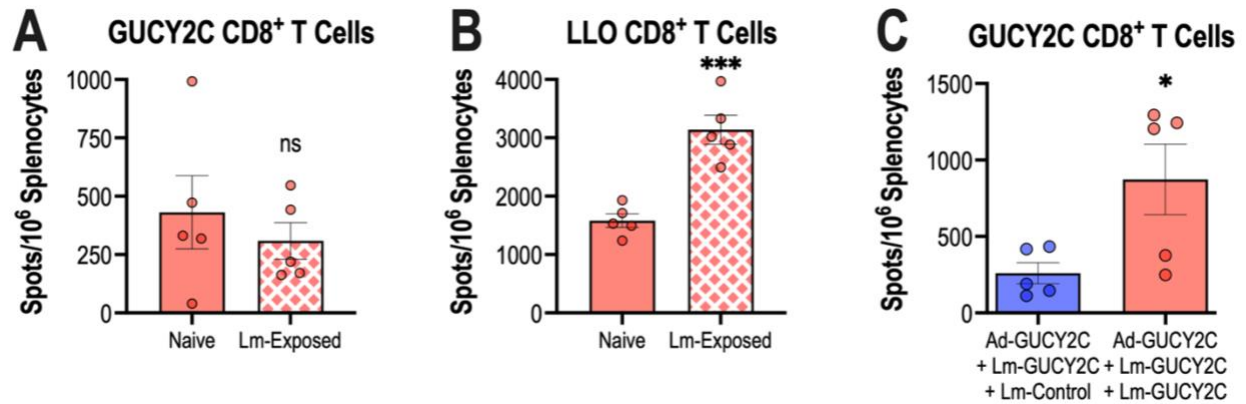

**Supplementary Figure 4. Prior Lm exposure does not reduce GUCY2C-specific CD8<sup>+</sup> T-cell expansion by Lm-GUCY2C boosting.** **A-B** BALB/cJ mice were exposed to control Lm by intravenous administration of  $5 \times 10^6$  CFU or left naïve (vehicle exposure) on day 0. Mice were immunized on day 14 with  $10^{10}$  vp of Ad-GUCY2C intramuscularly and boosted on day 35 with  $5 \times 10^6$  CFU of Lm-GUCY2C intravenously. Six days later, mice were euthanized and GUCY2C-specific (**A**) and LLO-specific (**B**) CD8<sup>+</sup> T-cell counts were quantified by IFN $\gamma$ -ELISpot. **C** BALB/cJ mice were immunized intramuscularly with  $10^{10}$  vp of Ad-GUCY2C on day 0, boosted with  $5 \times 10^6$  CFU of Lm-GUCY2C on day 21, and on day 42, mice were boosted a second time with  $5 \times 10^6$  CFU of control or GUCY2C Lm. GUCY2C-specific CD8<sup>+</sup> T-cells were quantified by IFN $\gamma$ -ELISpot 6 days after final immunization. T-cell counts were analyzed by T-test. Error bars indicate mean  $\pm$  SEM.

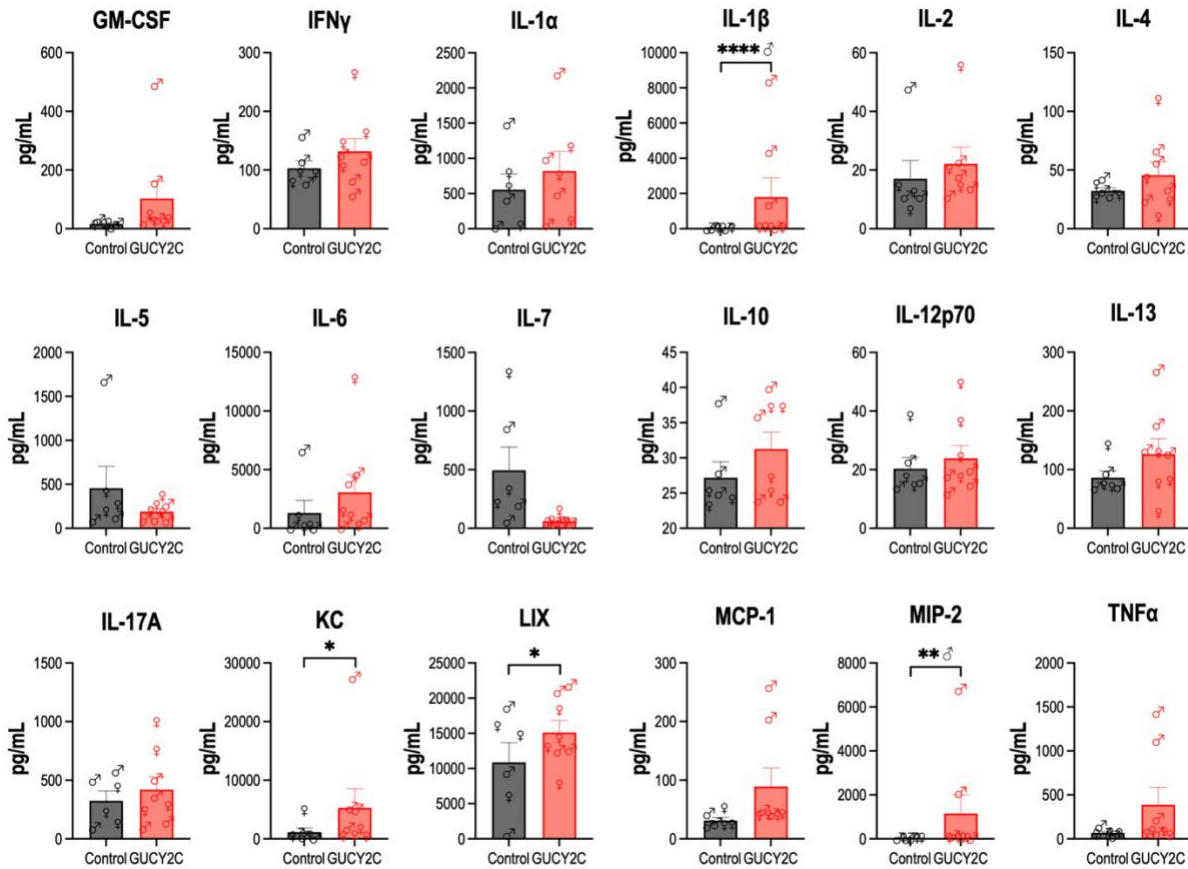

**Supplementary Figure 5. Blood cytokine responses to Ad-GUCY2C + Lm-GUCY2C immunization.** BALB/cJ mice were primed with  $10^{10}$  vp of control or GUCY2C Ad5.F35 i.m. and boosted with  $5 \times 10^6$  CFU of control or GUCY2C Lm i.v. at a 21-day interval. Plasma was collected 6 days later, and cytokines were quantified (Charles River). Statistics indicate comparisons by two-way ANOVA, with both sexes analyzed together. IL-1 $\beta$  and MIP-2 were significantly different only in males. Symbols indicate male (♂) and female (♀) mice. Error bars indicate mean  $\pm$  SEM.

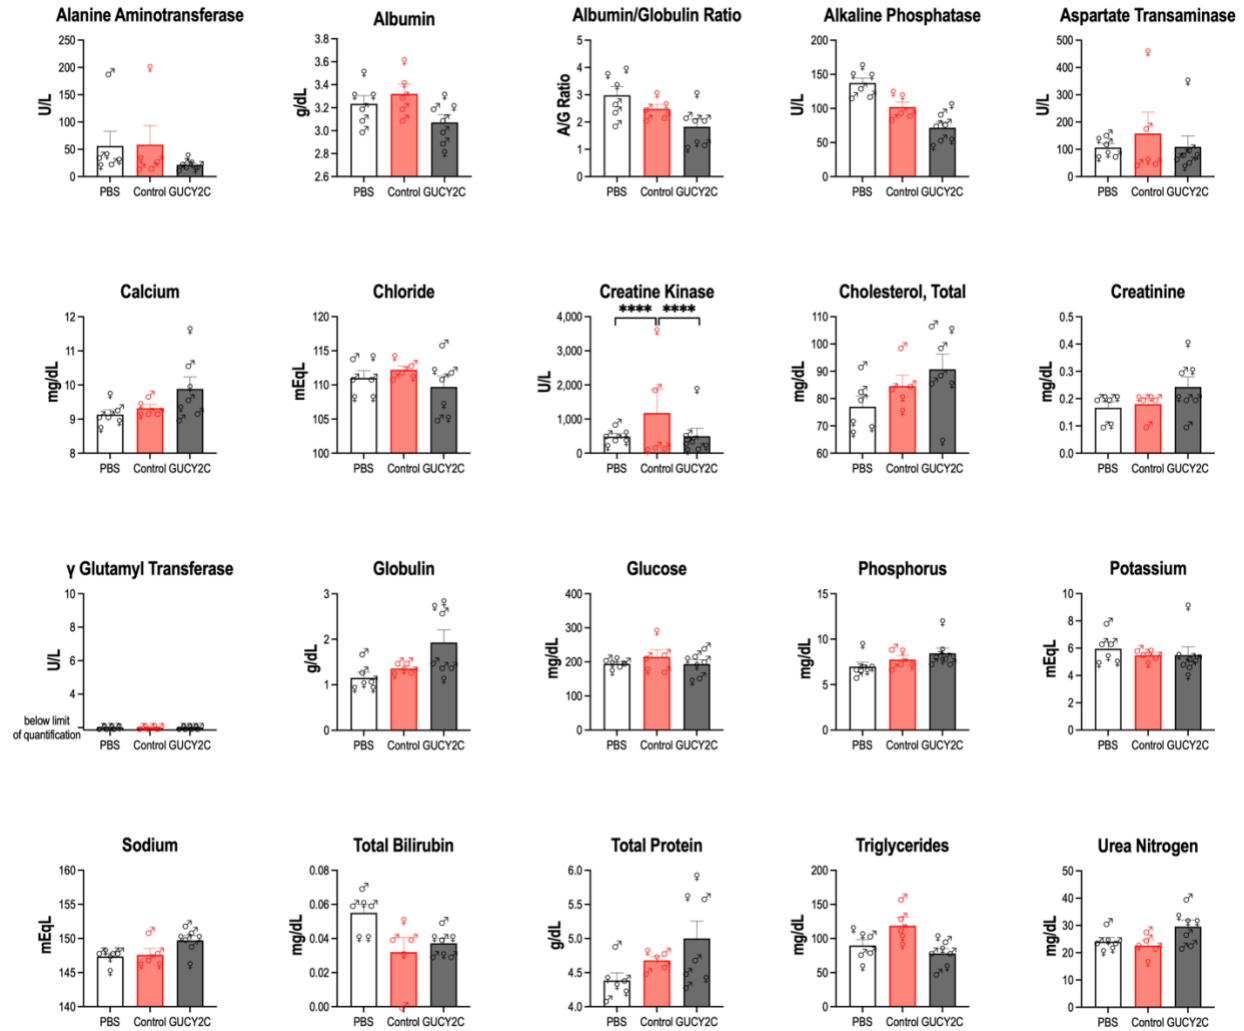

**Supplementary Figure 6. Clinical chemistry profiles following Ad-GUCY2C + Lm-GUCY2C immunization.** BALB/cJ mice received only PBS or were primed with  $10^{10}$  vp of control or GUCY2C Ad5.F35 i.m. and boosted with  $5 \times 10^6$  CFU of control or GUCY2C Lm i.v. at a 21-day interval. Plasma was collected 6 days later, and analytes were quantified (Eve Technologies). Statistics indicate comparisons by two-way ANOVA, with both sexes analyzed together. Symbols indicate male (♂) and female (♀) mice. Error bars indicate mean +/- SEM.

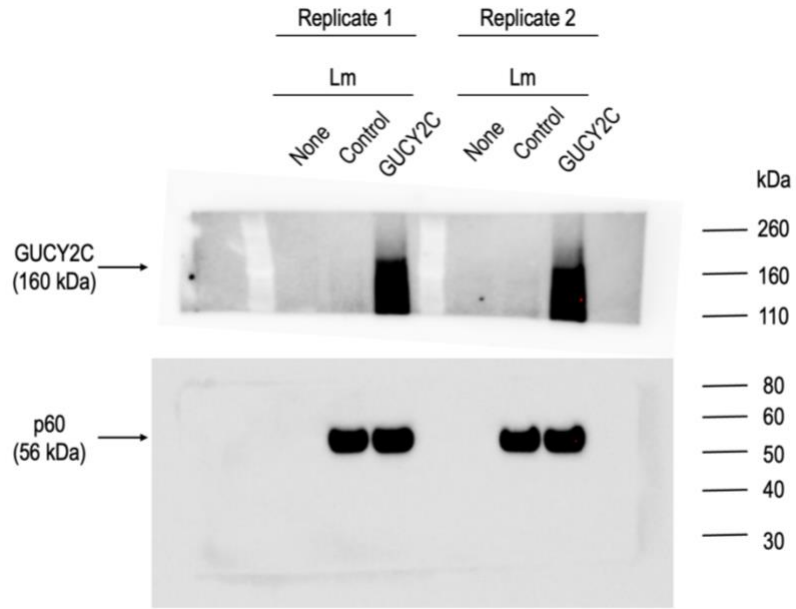

**Supplementary Figure 7. Uncropped western blot images.** Uncropped western blot images of replicate samples pertaining to cropped images shown in **Fig. 1C**, as indicated above.



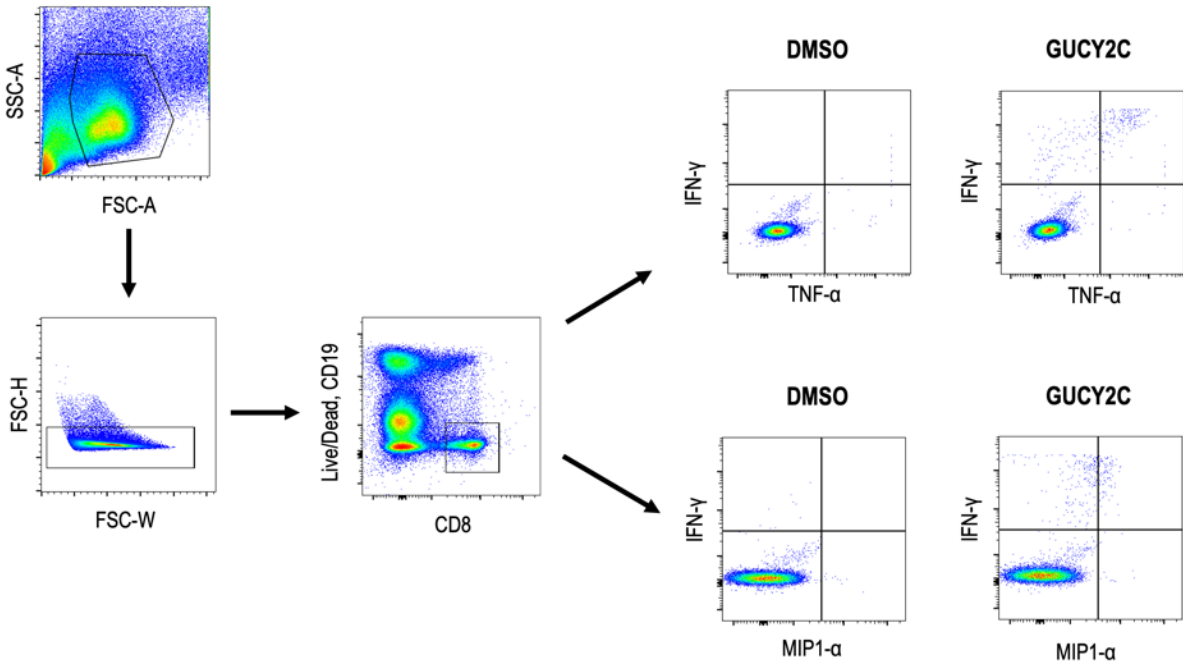

**Supplementary Figure 8. Representative intracellular cytokine staining for polyfunctionality analysis.** Lymphocytes were gated based on SSC-A and FSC-A profiles with doublets excluded based on FSC-H vs. FSC-W profiles. Dead cells and CD19<sup>+</sup> B cells were excluded by staining with LIVE/DEAD Aqua Blue and anti-CD19-BV510 antibody. Live/CD19<sup>-</sup>CD8<sup>+</sup> cells were gated and assessed for IFN $\gamma$ , TNF $\alpha$ , and/or MIP1 $\alpha$  staining using FlowJo Boolean gates (IFN $\gamma$ <sup>+</sup>TNF $\alpha$ <sup>-</sup>MIP1 $\alpha$ <sup>-</sup>, IFN $\gamma$ <sup>+</sup>TNF $\alpha$ <sup>+</sup>MIP1 $\alpha$ <sup>-</sup>, etc). A representative immunized mouse stimulated with DMSO or GUCY2C<sub>254-262</sub> peptide is shown, demonstrating specific detection of GUCY2C-reactive CD8<sup>+</sup> T cells. Single, double, and triple cytokine population frequencies are depicted in **Fig. 4B-D**.
