# Supplementary material for: Chimeric adenoviral (Ad5.F35) and listeria vector prime-boost immunization is safe and effective for cancer immunotherapy
Source: PubMed Central journal article supplement (PMC9226178; doi:10.1038/s41541-022-00483-z), 2022-06-23
Supplement: 41541_2022_483_MOESM2_ESM.pdf [file 41541_2022_483_MOESM2_ESM.pdf]

## Reporting Summary

Nature Portfolio wishes to improve the reproducibility of the work that we publish. This form provides structure for consistency and transparency in reporting. For further information on Nature Portfolio policies, see our [Editorial Policies](#) and the [Editorial Policy Checklist](#).

### Statistics

For all statistical analyses, confirm that the following items are present in the figure legend, table legend, main text, or Methods section.

- |     |           |
|-----|-----------|
| n/a | Confirmed |
|-----|-----------|
- The exact sample size ( $n$ ) for each experimental group/condition, given as a discrete number and unit of measurement
  - A statement on whether measurements were taken from distinct samples or whether the same sample was measured repeatedly
  - The statistical test(s) used AND whether they are one- or two-sided  
*Only common tests should be described solely by name; describe more complex techniques in the Methods section.*
  - A description of all covariates tested
  - A description of any assumptions or corrections, such as tests of normality and adjustment for multiple comparisons
  - A full description of the statistical parameters including central tendency (e.g. means) or other basic estimates (e.g. regression coefficient) AND variation (e.g. standard deviation) or associated estimates of uncertainty (e.g. confidence intervals)
  - For null hypothesis testing, the test statistic (e.g.  $F$ ,  $t$ ,  $r$ ) with confidence intervals, effect sizes, degrees of freedom and  $P$  value noted  
*Give  $P$  values as exact values whenever suitable.*
  - For Bayesian analysis, information on the choice of priors and Markov chain Monte Carlo settings
  - For hierarchical and complex designs, identification of the appropriate level for tests and full reporting of outcomes
  - Estimates of effect sizes (e.g. Cohen's  $d$ , Pearson's  $r$ ), indicating how they were calculated

*Our web collection on [statistics for biologists](#) contains articles on many of the points above.*

### Software and code

Policy information about [availability of computer code](#)

Data collection

Data analysis

For manuscripts utilizing custom algorithms or software that are central to the research but not yet described in published literature, software must be made available to editors and reviewers. We strongly encourage code deposition in a community repository (e.g. GitHub). See the Nature Portfolio [guidelines for submitting code & software](#) for further information.

### Data

Policy information about [availability of data](#)

All manuscripts must include a [data availability statement](#). This statement should provide the following information, where applicable:

- Accession codes, unique identifiers, or web links for publicly available datasets
- A description of any restrictions on data availability
- For clinical datasets or third party data, please ensure that the statement adheres to our [policy](#)

## Field-specific reporting

Please select the one below that is the best fit for your research. If you are not sure, read the appropriate sections before making your selection.

Life sciences  Behavioural & social sciences  Ecological, evolutionary & environmental sciences

For a reference copy of the document with all sections, see [nature.com/documents/nr-reporting-summary-flat.pdf](https://www.nature.com/documents/nr-reporting-summary-flat.pdf)

## Life sciences study design

All studies must disclose on these points even when the disclosure is negative.

|                 |                                                                                                                                       |
|-----------------|---------------------------------------------------------------------------------------------------------------------------------------|
| Sample size     | Sample sizes were determined by power calculations                                                                                    |
| Data exclusions | There were no data exclusions                                                                                                         |
| Replication     | All animal data are presented for in vivo and ex vivo (ex, ELISpot) studies. In vitro studies were replicated at least once.          |
| Randomization   | Animals were randomized to cohorts.                                                                                                   |
| Blinding        | Animals were assigned a number during randomization and investigators were blinded to allocation during data collection and analysis. |

## Reporting for specific materials, systems and methods

We require information from authors about some types of materials, experimental systems and methods used in many studies. Here, indicate whether each material, system or method listed is relevant to your study. If you are not sure if a list item applies to your research, read the appropriate section before selecting a response.

### Materials & experimental systems

| n/a                                 | Involved in the study                                           |
|-------------------------------------|-----------------------------------------------------------------|
| <input type="checkbox"/>            | <input checked="" type="checkbox"/> Antibodies                  |
| <input type="checkbox"/>            | <input checked="" type="checkbox"/> Eukaryotic cell lines       |
| <input checked="" type="checkbox"/> | <input type="checkbox"/> Palaeontology and archaeology          |
| <input type="checkbox"/>            | <input checked="" type="checkbox"/> Animals and other organisms |
| <input checked="" type="checkbox"/> | <input type="checkbox"/> Human research participants            |
| <input checked="" type="checkbox"/> | <input type="checkbox"/> Clinical data                          |
| <input checked="" type="checkbox"/> | <input type="checkbox"/> Dual use research of concern           |

### Methods

| n/a                                 | Involved in the study                              |
|-------------------------------------|----------------------------------------------------|
| <input checked="" type="checkbox"/> | <input type="checkbox"/> ChIP-seq                  |
| <input type="checkbox"/>            | <input checked="" type="checkbox"/> Flow cytometry |
| <input checked="" type="checkbox"/> | <input type="checkbox"/> MRI-based neuroimaging    |

## Antibodies

|                 |                                                                                                                                                                                                                                                                                                                                                                                                                                                                                                                                                                                                                                                                                    |
|-----------------|------------------------------------------------------------------------------------------------------------------------------------------------------------------------------------------------------------------------------------------------------------------------------------------------------------------------------------------------------------------------------------------------------------------------------------------------------------------------------------------------------------------------------------------------------------------------------------------------------------------------------------------------------------------------------------|
| Antibodies used | <ol style="list-style-type: none"> <li>anti-GUCY2C antibody MS20 (in-house production)</li> <li>anti-p60 monoclonal antibody (clone p6017; AdipoGen)</li> <li>anti-CD8-PerCP-Cy5.5 (clone 53-6.7; BD Biosciences)</li> <li>anti-CD19-BV510 (clone 6D5; Biolegend)</li> <li>anti-IFN<math>\gamma</math>-PE-CF594 (clone XMG1.2; BD Biosciences)</li> <li>anti-TNF<math>\alpha</math>-PE-Cy7 (clone MP6-XT22, BD Biosciences)</li> <li>anti-MIP1<math>\alpha</math>-APC (clone 39624; R&amp;D Systems)</li> </ol>                                                                                                                                                                    |
| Validation      | <ol style="list-style-type: none"> <li>anti-GUCY2C antibody MS20 (in-house production) validated in Marszalowicz, G. P., et al. Oncotarget 5, 9460–9471 (2014) and routinely re-validated by western blot on GUCY2C+/+ and GUCY2C-/- tissues.</li> <li>anti-p60 monoclonal antibody p6017 (AdipoGen) validated on negative-control and recombinant listeria monocytogenes cultures.</li> <li>-7. The anti-CD8, anti-CD19, anti-IFN<math>\gamma</math>, anti-TNF<math>\alpha</math>, and anti-MIP1<math>\alpha</math> clones have been used and validated extensively. References for each are available on the BD Biosciences, Biolegend, and R&amp;D Systems websites.</li> </ol> |

## Eukaryotic cell lines

Policy information about [cell lines](#)

|                          |                                                            |
|--------------------------|------------------------------------------------------------|
| Cell line source(s)      | CT26 and J774A.1 cells were from ATCC                      |
| Authentication           | STR Profiling was employed for authentication.             |
| Mycoplasma contamination | Negative mycoplasma contamination was routinely confirmed. |

Commonly misidentified lines  
(See [ICLAC](#) register)

No commonly misidentified cell lines were used.

## Animals and other organisms

Policy information about [studies involving animals](#); [ARRIVE guidelines](#) recommended for reporting animal research

Laboratory animals

Male and female BALB/cJ mice from Jax Laboratory, 8-12 weeks of age were used.

Wild animals

No wild animals were used.

Field-collected samples

No field-collected samples were used.

Ethics oversight

The Thomas Jefferson University Institutional Animal Care and Use Committee (IACUC) provided oversight.

Note that full information on the approval of the study protocol must also be provided in the manuscript.

## Flow Cytometry

### Plots

Confirm that:

- The axis labels state the marker and fluorochrome used (e.g. CD4-FITC).
- The axis scales are clearly visible. Include numbers along axes only for bottom left plot of group (a 'group' is an analysis of identical markers).
- All plots are contour plots with outliers or pseudocolor plots.
- A numerical value for number of cells or percentage (with statistics) is provided.

### Methodology

Sample preparation

Splenocytes were collected from immunized animals by mechanical disruption and red blood cell lysis. Samples were plated in a 96-well plate at 1e6/well in the presence of DMSO or peptide. Cells were incubated at 37°C for 1h, protein transport inhibitor cocktail (eBioscience) was added, and splenocytes were incubated an additional 5 hours at 37°C. Cells were then stained with LIVE/DEAD Fixable Aqua Dead Cell Stain Kit (Invitrogen), anti-CD8-PerCP-Cy5.5 (clone 53-6.7; BD Biosciences), and anti-CD19-BV510 (clone 6D5; Biolegend). A BD Cytotfix/Cytoperm Kit (BD Biosciences) was used for permeabilization and intracellular cytokine staining using anti-IFN $\gamma$ -PE-CF594 (clone XMG1.2; BD Biosciences), anti-TNF $\alpha$ -PE-Cy7 (clone MP6-XT22, BD Biosciences), and anti-MIP1 $\alpha$ -APC (clone 39624; R&D Systems). Cells were fixed in 2% paraformaldehyde.

Instrument

BD LSR II flow cytometer

Software

Analyses were performed using FlowJo software (TreeStar)

Cell population abundance

No sorting was performed.

Gating strategy

Gates were created based on FMO samples. The full gating strategy for a representative sample is provided in Supplementary Fig. S8.

- Tick this box to confirm that a figure exemplifying the gating strategy is provided in the Supplementary Information.
